# Supplementary material for: New Insights into the Enhancement Effect of Exogenous Calcium on Biochar Stability during Its Aging in Farmland Soil
Source: Preprints.org preprint supplement (doi:10.20944/preprints202305.2235.v1), 2023-05-31
Supplement: Supplementary file 1 [file supplementary]

**Supporting Information**

**New insights into the enhancement effect of exogenous calcium on biochar stability during its aging in farmland soil**

Hongyan Nan1,2, Yunqiu Jiang3, Weiqi Zhou4, Ling Zhao2,5,Fan Yang6,*

1*School of Chemical Engineering, Zhengzhou University, Henan 450001, China*

2*School of Environmental Science and Engineering, Shanghai Jiao Tong University, Shanghai 200240, China*

*3Hydrology and water resources Survey Bureau of the upper reaches of the Yangtze River,* *Hydrology Bureau of Yangtze River Water Resources Commission, Chongqing 400010, China*

*4Shanghai Investigation, Design & Research Institute Co., Ltd, Shanghai 200050, China*

5*China-UK Low Carbon College, Shanghai Jiao Tong University, Shanghai 201306, China*

6*School of Environment and Architecture,* *University of Shanghai for Science and Technology, Shanghai 200093, China*

*Corresponding author: Fan Yang

E-mail: yangfanusst@usst.edu.cn

**Table S1.** Main element contents and pore structure parameters of four biochars.

| Biochar | Ash  % | C  % | O  % | H  % | N  % | Ca  g·kg-1 | SA-N2 m2·g–1 | PS nm |
| --- | --- | --- | --- | --- | --- | --- | --- | --- |
| SSBC | 54.3±1.2 | 24.2±0.1 | 9.28±0.2 | 1.44±0.2 | 3.50±0.1 | 17.8±1.2 | 8.50 | 2.18 |
| Ca-SSBC | 60.1±0.8 | 19.1±0.1 | 6.61±0.1 | 1.46±0.1 | 2.41±0.1 | 96.6±3.2 | 6.04 | 4.22 |
| BDBC | 55.3±0.1 | 17.2±0.7 | 17.0±0.1 | 1.23±0.1 | 2.63±0.1 | 99.4±7.2 | 89.6 | 9.73 |
| Ca-BDBC | 83.8±0.4 | 12.5±0.9 | 13.1±0.2 | 2.47±0.2 | 1.90±0.2 | 153±10.7 | 119.7 | 6.79 |

SSBC: sewage sludge biochar; Ca-SSBC: CaCl2+sewage sludge biochar; BD: bone dreg biochar; Ca-BDBC: CaCl2+bone dreg biochar; SA: BET-N2 surface area; PS: pore size.


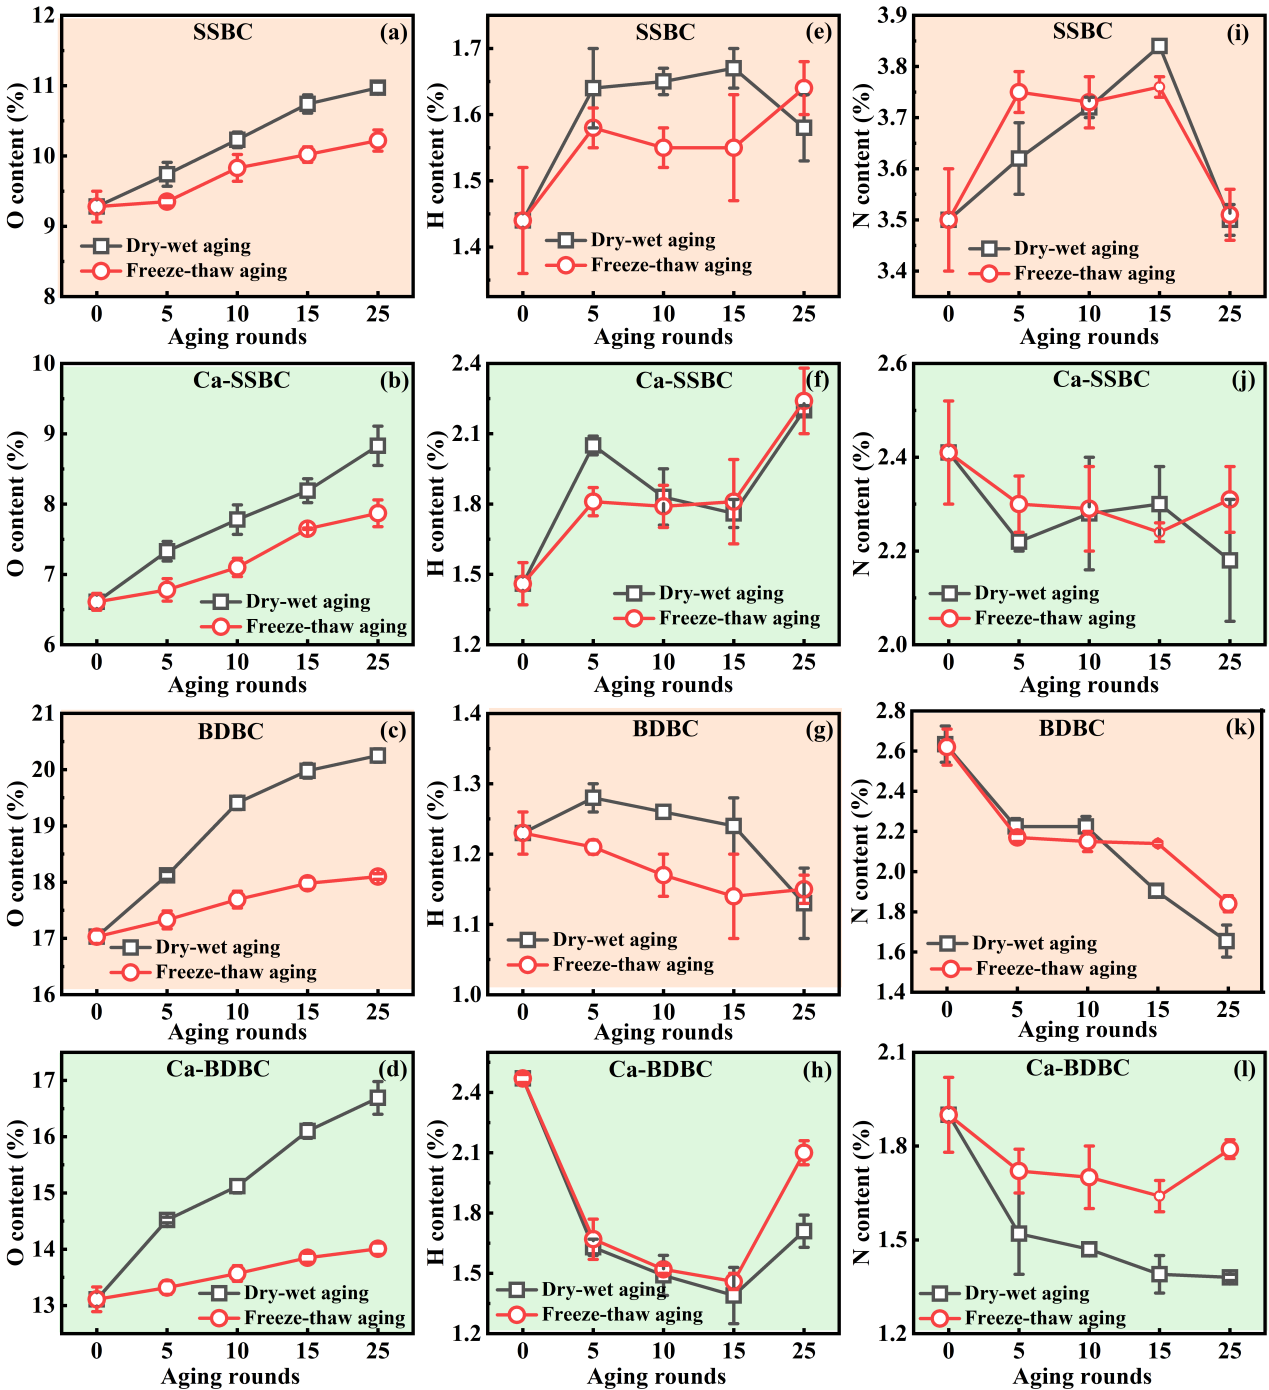


**Figure S1.** Variations of oxygen (O), hydrogen (H), and nitrogen (N) element contents in pristine biochar and Ca-rich biochar under different aging processes (n=3) (SSBC: sewage sludge biochar; BDBC: bone dreg biochar; Ca-SSBC: CaCl2+sewage sludge biochar; Ca-BDBC: CaCl2+bone dreg biochar)


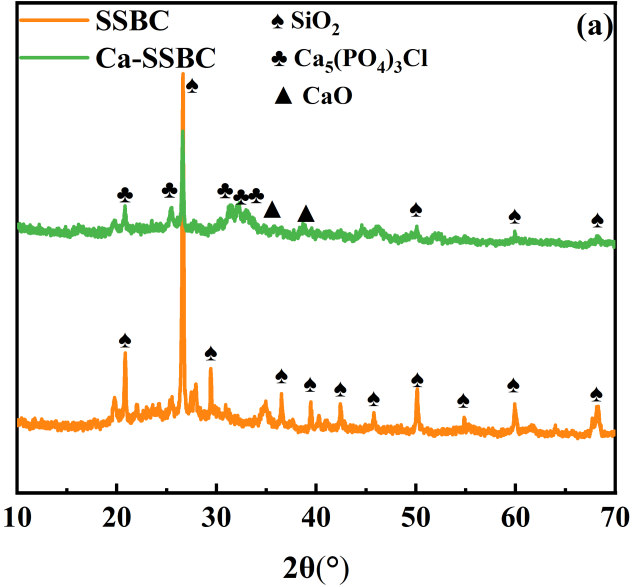

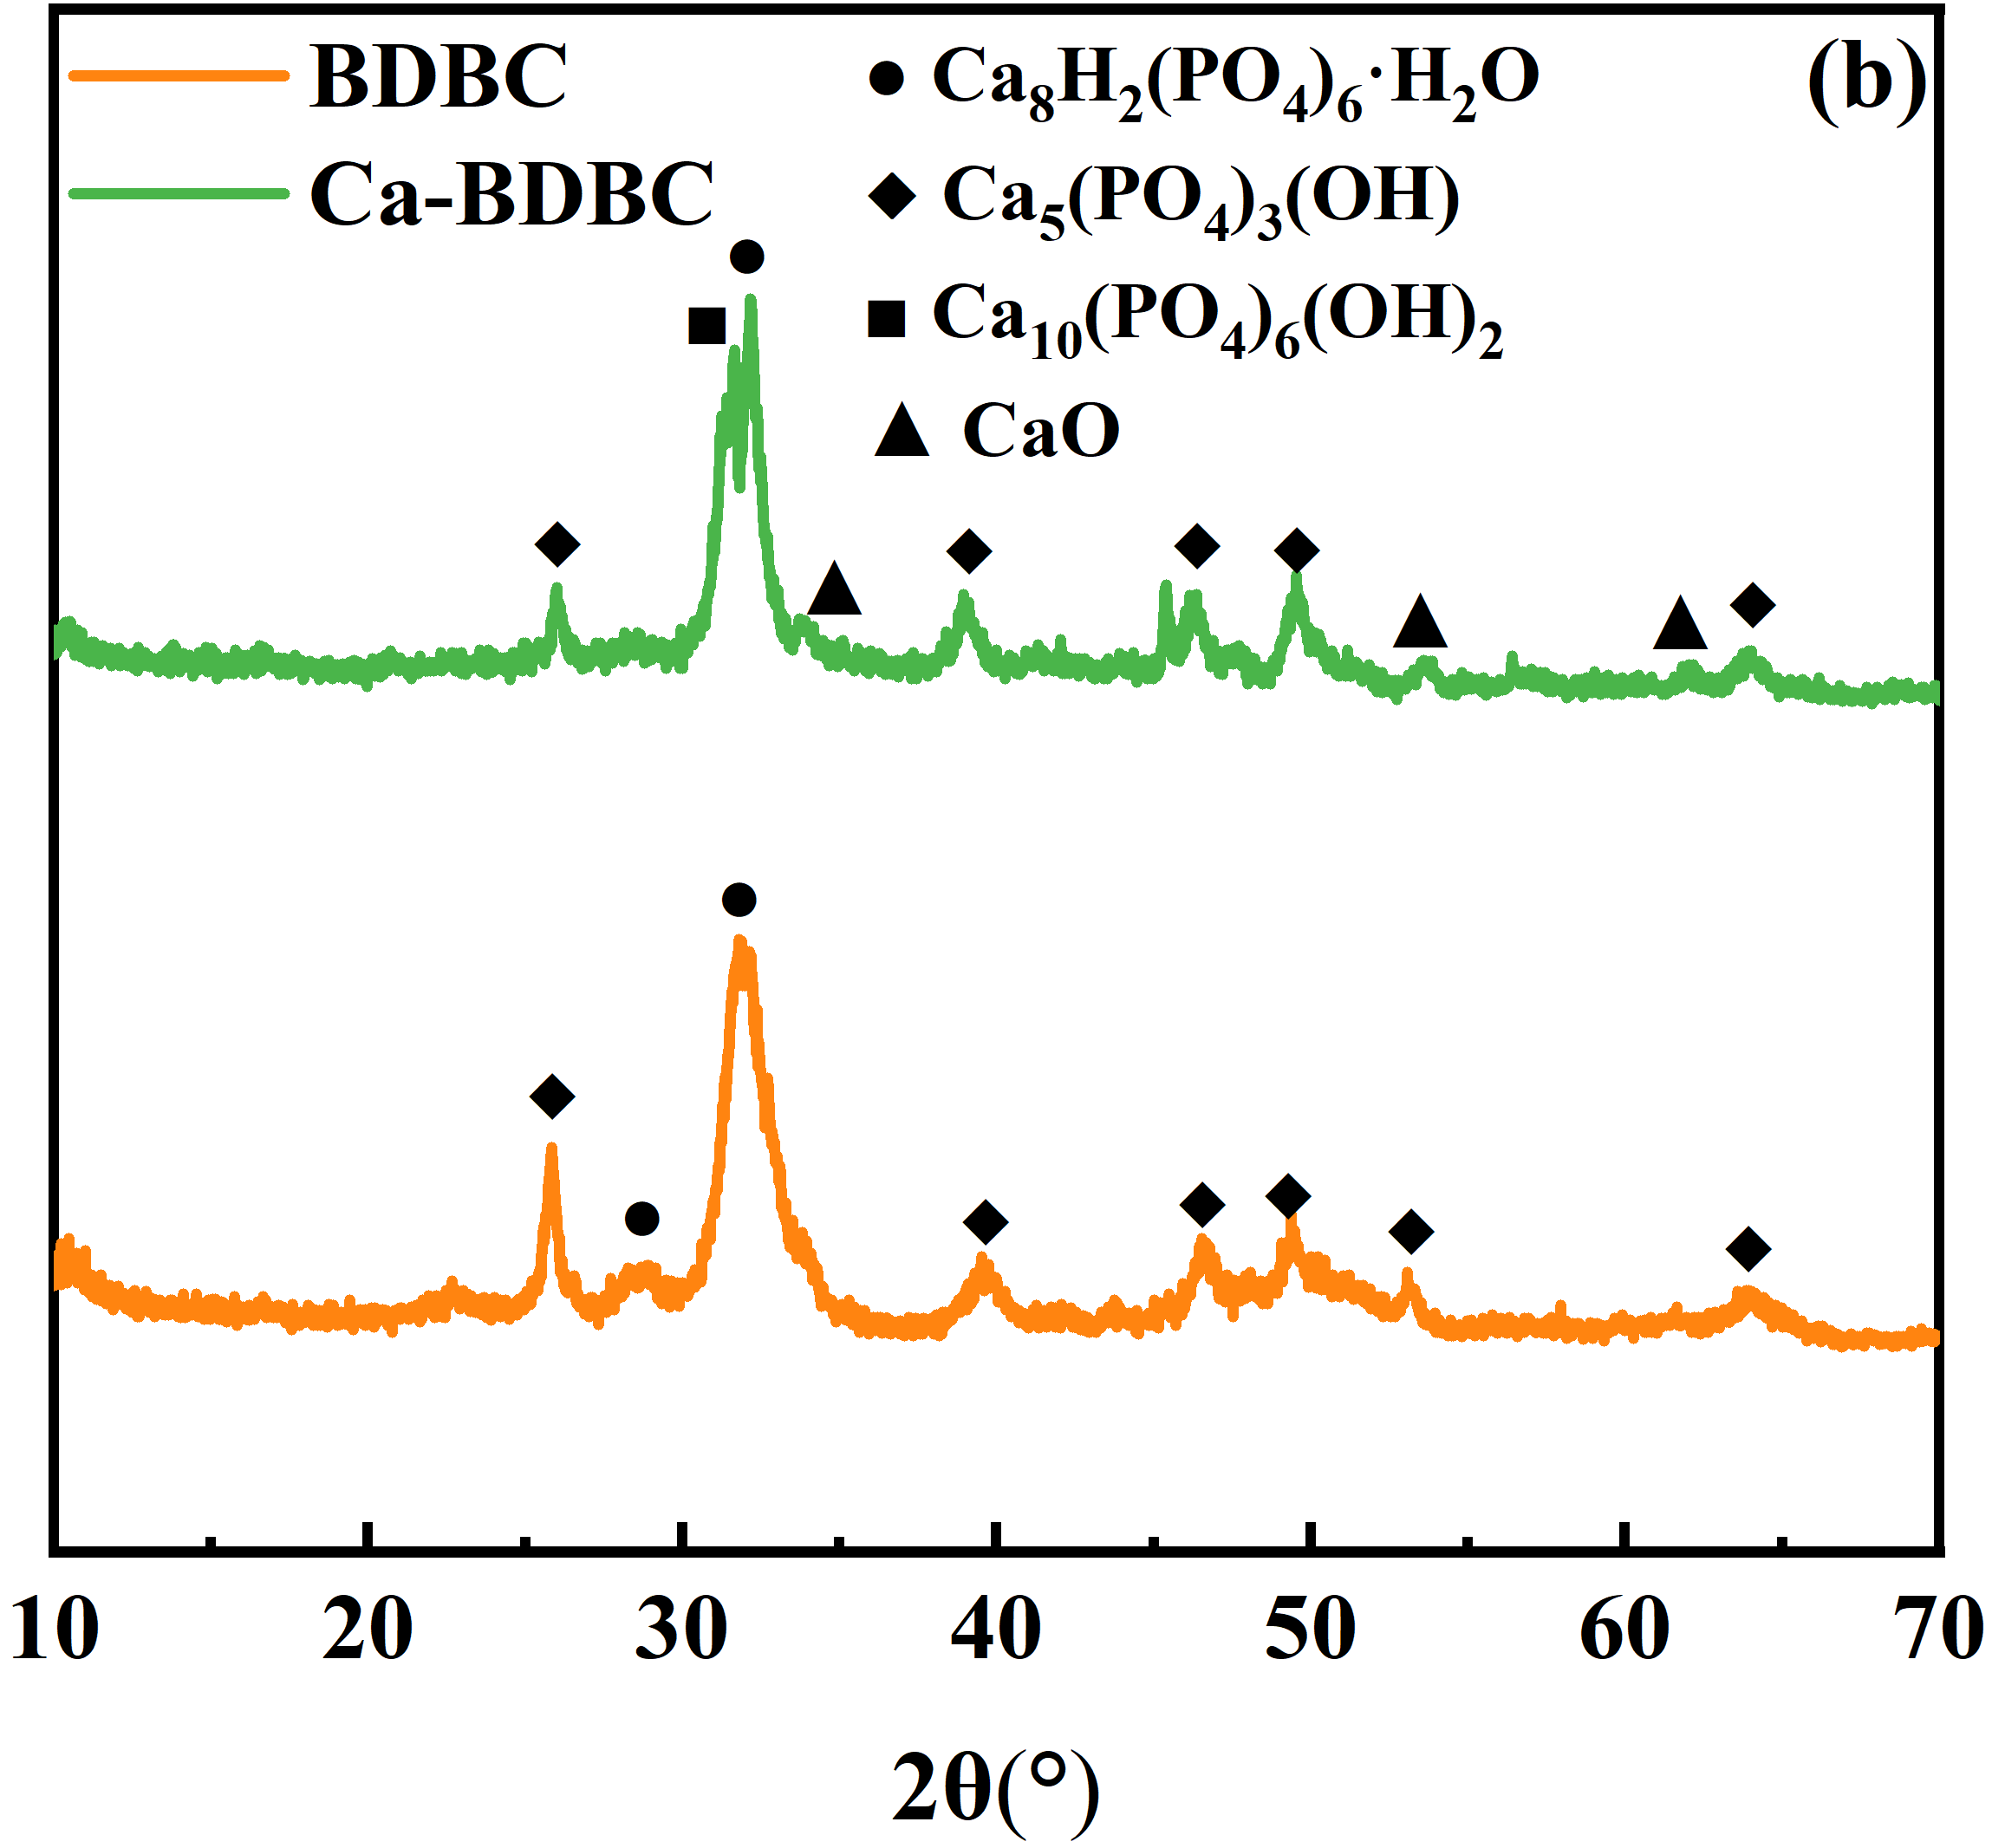


**Figure S2.** Surface crystals compositions of pristine biochar (SSBC: sewage sludge biochar; BDBC: bone dreg biochar) and Ca-rich biochar (Ca-SSBC: CaCl2+sewage sludge biochar; Ca-BDBC: CaCl2+bone dreg biochar).


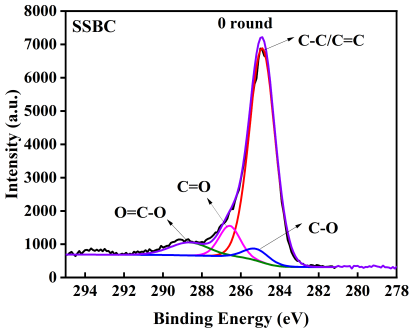

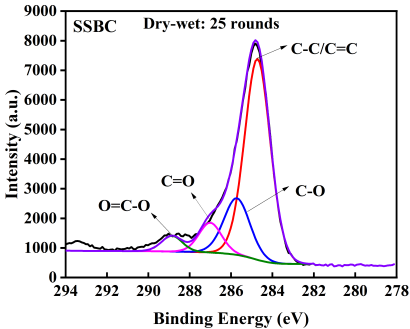

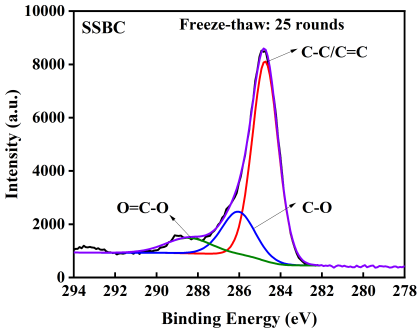


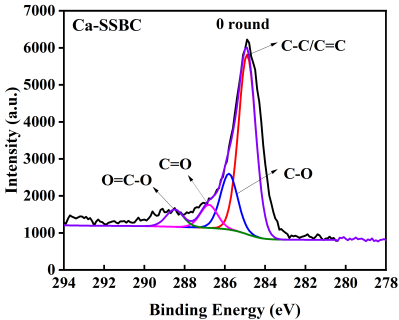

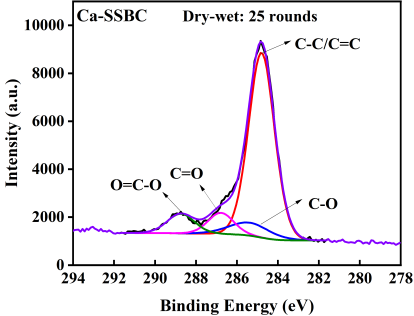

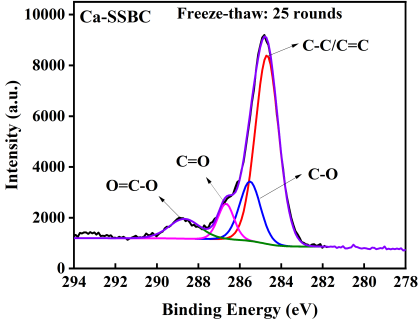


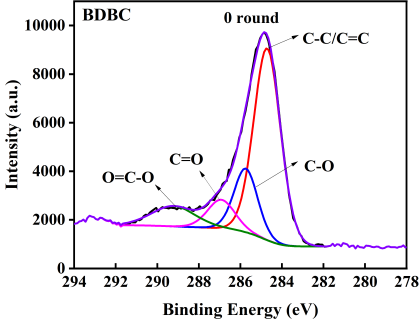

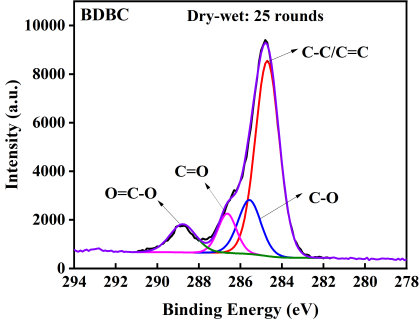

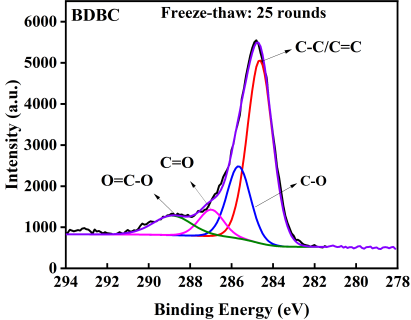

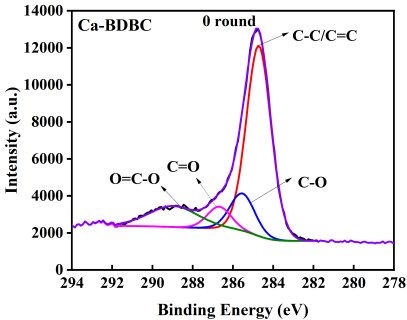

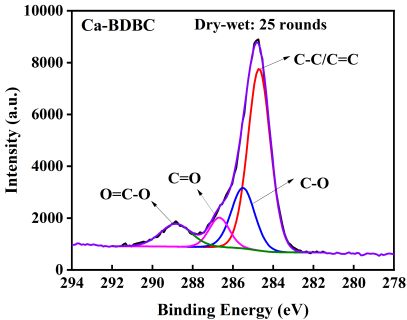

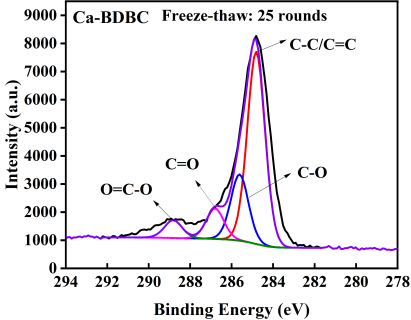


**Figure S3.** Surface carbon functional groups of pristine biochar and Ca-rich biochar with different aging processes (SSBC: sewage sludge biochar; BDBC: bone dreg biochar; Ca-SSBC: CaCl2+sewage sludge biochar; Ca-BDBC: CaCl2+bone dreg biochar)
